# Supplementary material for: Microbial oil-degradation under mild hydrostatic pressure (10 MPa): which pathways are impacted in piezosensitive hydrocarbonoclastic bacteria?
Source: PubMed Central journal article supplement (PMC4810429; doi:10.1038/srep23526), 2016-03-29
Supplement: srep23526-s1.pdf [file srep23526-s1.pdf]

**Microbial oil-degradation under mild hydrostatic pressure (10MPa): which pathways are impacted in piezosensitive hydrocarbonoclastic bacteria?**

Alberto Scoma<sup>1+</sup>, Marta Barbato<sup>2+</sup>, Emma Hernandez-Sanabria<sup>1</sup>, Francesca Mapelli<sup>2</sup>, Daniele Daffonchio<sup>2,3</sup>, Sara Borin<sup>2</sup>, and Nico Boon<sup>1\*</sup>

<sup>1</sup> Laboratory of Microbial Ecology and Technology (LabMET), University of Gent, Coupure Links 653, B 9000 Gent, Belgium

<sup>2</sup> Department of Food, Environmental and Nutritional Sciences (DeFENS), University of Milano, Via Celoria 2, 20133, Milano, Italy

<sup>3</sup> Biological and Environmental Sciences and Engineering Division, King Abdullah University of Science and Technology (KAUST), 4700, Thuwal 23955-6900, Kingdom of Saudi Arabia

\* corresponding author: Prof. Nico Boon, LabMET – Ugent, Coupure Links 653, 9000, Gent; [Nico.Boon@UGent.be](mailto:Nico.Boon@UGent.be); Phone +32 (0)9 264 59 76; Fax +32 (0)9 264 62 48.

+ these authors contributed equally to this work

## Supplementary Information

**Figure S1** C12 bioavailability in *A. jadensis* KS\_339 (purple) and *A. dieselolei* KS\_293 (green) under atmospheric (0.1 MPa) and mild pressure (5 and 10MPa). Initial C12 concentration provided was equal to  $7.5 \text{ g L}^{-1}$ . Bars indicate 95% confidence intervals.

**Figure S2** Growth of *A. jadensis* KS\_339 (purple) and *A. dieselolei* KS\_293 (green) under atmospheric pressure (0.1 MPa) using air or pure O<sub>2</sub> as gas phase. Bars indicate 95% confidence intervals.

**Figure S3** Total CO<sub>2</sub> production in *A. jadensis* KS\_339 (purple) and *A. dieselolei* KS\_293 (green) under atmospheric (0.1 MPa) and mild pressure (5 and 10MPa). Bars indicate 95% confidence intervals.

**Table S1** Total amount of O<sub>2</sub> transferred to the liquid phase by increased hydrostatic pressure to 10MPa. Measurements were conducted with sterile controls at 10MPa. Provided that diffusion is linear<sup>53</sup>, at 5MPa O<sub>2</sub> delivered to the culture was equal to 3.09mM.

**Table S2** Respiration capacity of *Alcanivorax* cells under 5 and 10MPa. Cell number and respiration rate values are derived from Fig. 1B and 3B

**Table S3** Expression of some typical pressure-resistance pool of genes in *A. dieselolei* KS\_293 cells under 10 and 0.1MPa.

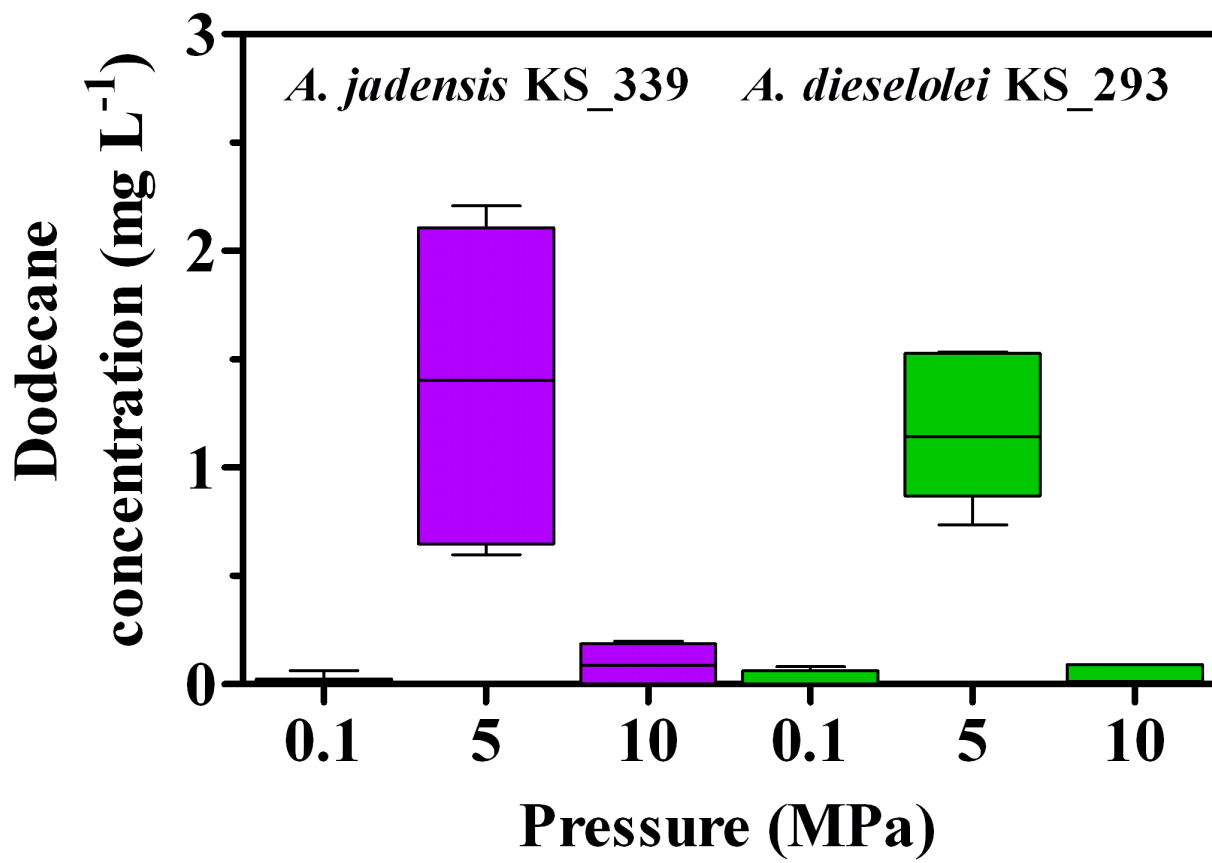

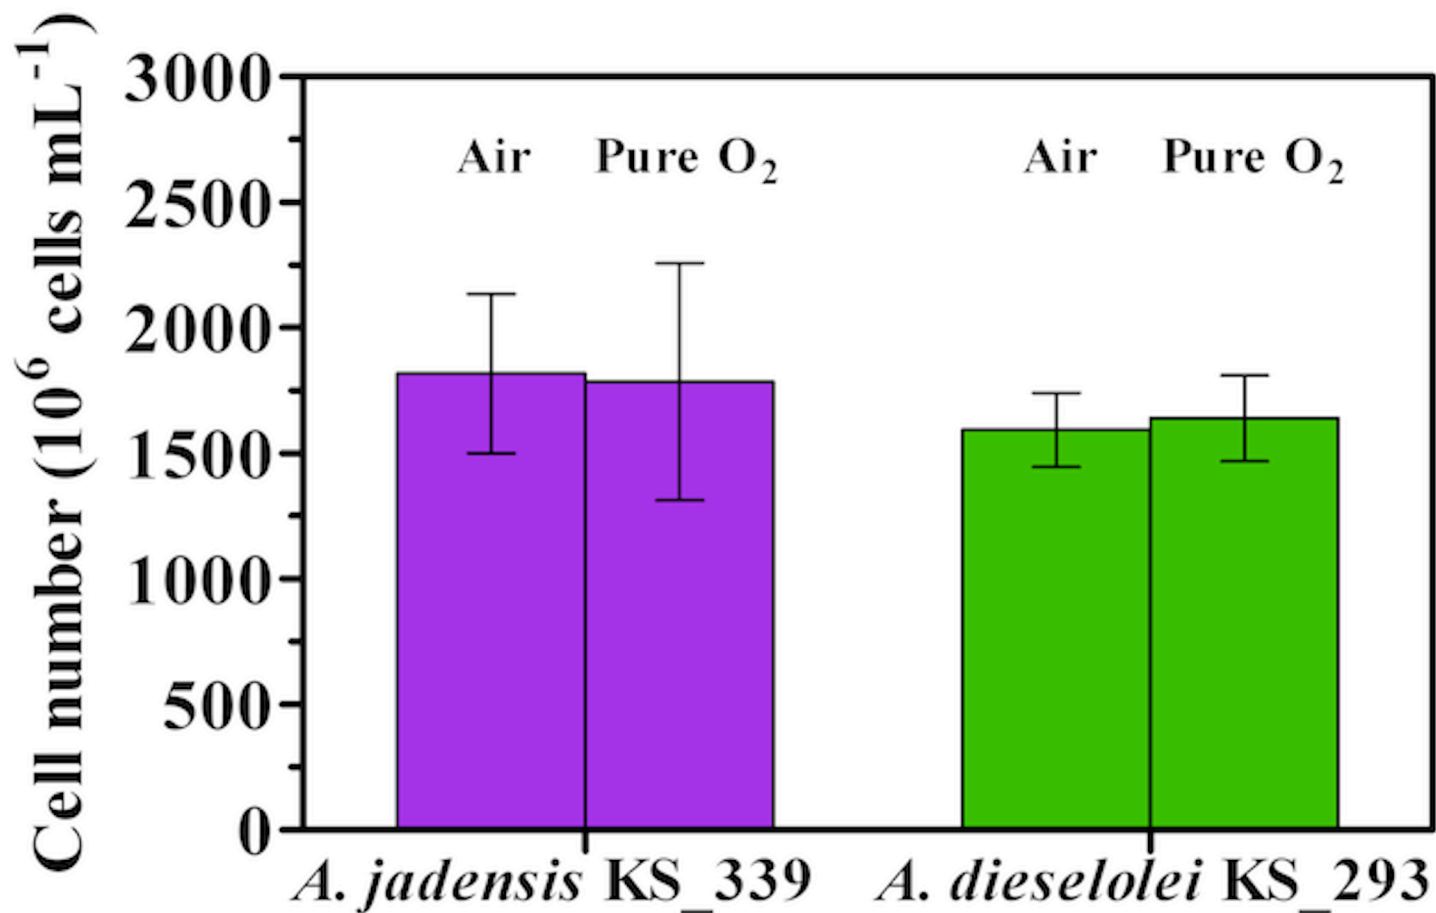

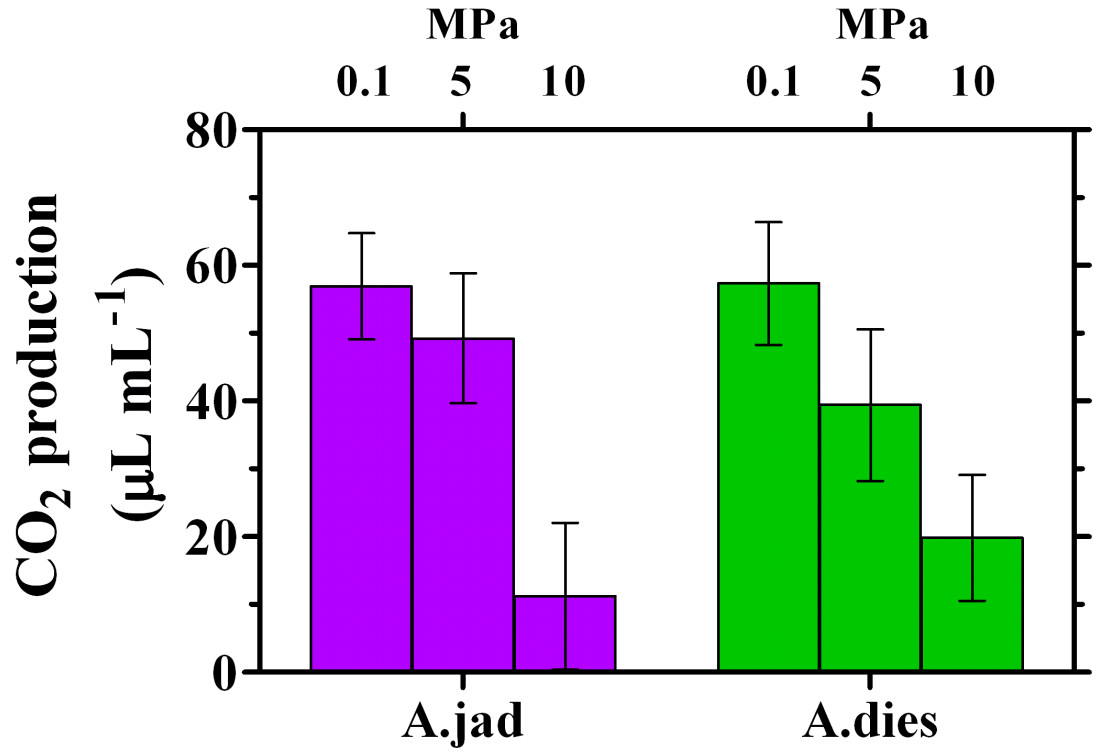

**Table S1: Expression of some typical pressure-resistance pool of genes in *A. dieselolei* KS\_293 cells under 10 and 0.1MPa**

| Function                        | Regulation   | log2 FC | 10MPa  | 0.1MPa | Cluster ID | Locus Tag                                                          | Description |
|---------------------------------|--------------|---------|--------|--------|------------|--------------------------------------------------------------------|-------------|
| <i>Cell division</i>            |              |         |        |        |            |                                                                    |             |
| -                               | <b>-0.71</b> | 64.5    | 105.3  | 1439   | B5T_03495  | Cell division protein FtsL                                         |             |
| -                               | <b>-1.59</b> | 1.6     | 4.7    | 1370   | B5T_01893  | Cell division topological specificity factor                       |             |
| -                               | <b>-1.84</b> | 10.0    | 35.8   | 646    | B5T_01894  | Cell division inhibitor, membrane ATPase                           |             |
| -                               | <b>-1.87</b> | 6.0     | 21.8   | 449    | B5T_03484  | Cell division protein FtsA                                         |             |
| -                               | <b>-1.96</b> | 8.5     | 33.0   | 2138   | B5T_03483  | Cell division protein FtsZ                                         |             |
| -                               | <b>-3.5</b>  | 1.0     | 11.8   | 539    | B5T_03489  | Cell division protein FtsW                                         |             |
| <i>Outer Membrane Protein</i>   |              |         |        |        |            |                                                                    |             |
| -                               | <b>-0.68</b> | 25.1    | 40.2   | 1785   | B5T_02341  | OmpA family protein                                                |             |
| -                               | <b>-0.77</b> | 3.9     | 6.6    | 1985   | B5T_02487  | OmpA family protein                                                |             |
| -                               | <b>-0.99</b> | 548.4   | 1088.7 | 1217   | B5T_01469  | Thrombospondin type 3 repeat family, OmpA-OmpF porin, OOP family   |             |
| -                               | <b>-1.05</b> | 9.3     | 19.3   | 927    | B5T_01929  | Outer membrane protein assembly complex, YaeT protein              |             |
| -                               | <b>-1.38</b> | 18.5    | 48.1   | 965    | B5T_03555  | Outer membrane protein transport protein (OMPP1/FadL/TodX)         |             |
| -                               | <b>-1.74</b> | 2.2     | 7.2    | 980    | B5T_01647  | Efflux transporter, outer membrane factor lipoprotein, NodT family |             |
| -                               | <b>-1.85</b> | 6.8     | 24.7   | 1169   | B5T_01197  | Outer membrane assembly lipoprotein YfgL                           |             |
| -                               | <b>-2.65</b> | 27.9    | 175.6  | 588    | B5T_03706  | Outer membrane assembly lipoprotein YfiO                           |             |
| -                               | <b>-3.19</b> | 0.2     | 1.8    | 1031   | B5T_03240  | Outer membrane protein, OMP85 family, putative                     |             |
| -                               | <b>-3.24</b> | 23.9    | 225.7  | 613    | B5T_01116  | OmpW family                                                        |             |
| -                               | <b>-3.59</b> | 0.9     | 10.3   | 531    | B5T_01930  | Outer membrane protein (OmpH-like)                                 |             |
| -                               | <b>-5.03</b> | 0.1     | 2.7    | 1457   | B5T_00661  | Type I secretion outer membrane protein, TolC family               |             |
| -                               | <b>-5.2</b>  | 0.5     | 17.9   | 1416   | B5T_03628  | Outer membrane lipoprotein LolB                                    |             |
| <i>Sigma Factor</i>             |              |         |        |        |            |                                                                    |             |
| -                               | <b>-0.78</b> | 60.4    | 103.6  | 1579   | B5T_00961  | RNA polymerase sigma factor                                        |             |
| -                               | <b>-1.11</b> | 288.6   | 622.9  | 1243   | B5T_00231  | RNA polymerase sigma factor                                        |             |
| -                               | <b>-1.33</b> | 6.4     | 16.0   | 1698   | B5T_00495  | Regulator of RNA polymerase sigma(70)                              |             |
| -                               | <b>-1.73</b> | 203.6   | 674.8  | 798    | B5T_01530  | RNA polymerase sigma factor                                        |             |
| -                               | <b>-1.79</b> | 6.9     | 23.8   | 1798   | B5T_03577  | RNA polymerase sigma-54 factor                                     |             |
| -                               | <b>-2.95</b> | 4.3     | 33.5   | 363    | B5T_00812  | RNA polymerase sigma factor, sigma-70 family                       |             |
| <i>Heat/Cold Shock Proteins</i> |              |         |        |        |            |                                                                    |             |
| =                               | <b>0.44</b>  | 85.7    | 63.0   | 412    | B5T_03857  | Ribosome-binding factor A; <i>Csp</i> ;                            |             |
| =                               | <b>0.03</b>  | 55.2    | 54.0   | 1277   | B5T_03011  | Hsp20/alpha crystallin family                                      |             |

Sheet1

|   |              |       |       |      |           |                                                                         |
|---|--------------|-------|-------|------|-----------|-------------------------------------------------------------------------|
| - | <b>-1.88</b> | 104.2 | 383.3 | 943  | B5T_01982 | Cold shock-like protein; <i>CspD</i>                                    |
| - | <b>-1.89</b> | 1.3   | 4.7   | 2071 | B5T_03275 | ATPase, histidine kinase-, DNA gyrase B-, and HSP90-like domain protein |
| - | <b>-1.98</b> | 2.4   | 9.4   | 2179 | B5T_00995 | ATPase, histidine kinase-, DNA gyrase B-, and HSP90-like domain protein |
| - | <b>-2.14</b> | 13.3  | 58.8  | 142  | B5T_03709 | ATPase, histidine kinase-, DNA gyrase B-, and HSP90-like domain protein |
| - | <b>-3.08</b> | 2.1   | 17.3  | 1693 | B5T_01542 | ATPase, histidine kinase-, DNA gyrase B-, and HSP90-like domain protein |
| - | <b>-4.03</b> | 0.4   | 6.9   | 382  | B5T_01201 | ATPase, histidine kinase-, DNA gyrase B-, and HSP90-like domain protein |
| - | <b>-4.06</b> | 1.7   | 27.5  | 647  | B5T_01484 | ATPase, histidine kinase-, DNA gyrase B-, and HSP90-like domain protein |
| - | <b>-5.28</b> | 0.4   | 13.8  | 640  | B5T_00504 | ATPase, histidine kinase-, DNA gyrase B-, and HSP90-like domain protein |

---

Sheet1

**Table S2: Total amount of O<sub>2</sub> transferred to the liquid phase by increased hydrostatic pressure to 10MPa. Measurements were conducted with sterile controls at 10MPa. Provided that diffusion is linear<sup>1</sup>, at 5MPa O<sub>2</sub> delivered to the culture was equal to 3.09mM.**

| Hydrostatic pressure | O <sub>2</sub> in the headspace | Total head-space | Total O <sub>2</sub> moving to the water-phase | Total O <sub>2</sub> moving to the water-phase |
|----------------------|---------------------------------|------------------|------------------------------------------------|------------------------------------------------|
| MPa                  | %                               | mL               | mL                                             | mM                                             |
| 0.1                  | 19.37 ±0.09                     | 6.5              | -                                              | -                                              |
| 10                   | 11.34 ±1.93                     | 6.5              | 0.52 ±0.09                                     | 6.18 ±1.13                                     |



# Sheet1

**Table S3. Respiration capacity of *Alcanivorax* cells under 5 and 10MPa. Cell number and respiration rate values are derived from Fig. 1B and 3B**

| Pressure | <i>A. jadensis</i>                        | <i>A. dieselolei</i> | <i>A. jadensis</i>                                                     | <i>A. dieselolei</i> | <i>A. jadensis</i> | <i>A. dieselolei</i> |
|----------|-------------------------------------------|----------------------|------------------------------------------------------------------------|----------------------|--------------------|----------------------|
| MPa      | Cell number<br>(10 <sup>9</sup> cells/mL) |                      | Respiration rate<br>( $\mu$ mol O <sub>2</sub> /10 <sup>9</sup> cells) |                      | mM respiration     |                      |
| 5        | 0.86                                      | 0.79                 | 4.1                                                                    | 5.7                  | 3.6                | 4.5                  |
| 10       | 0.54                                      | 0.44                 | 10.5                                                                   | 8.6                  | 5.7                | 3.8                  |

## References

1. Enns, T., Scholander, P.F. & Bradstreet, E.D. The effect of hydrostatic pressure on gases dissolved in water. *J Phys Chem* **69**:389-391 (1965)
